# Supplementary material for: Near stoichiometric lithium niobate crystal with dramatically enhanced piezoelectric performance for high-temperature acceleration sensing
Source: Royal Society of Chemistry journal article supplement (doi:10.1039/d4tc02466d), 2024-01-01
Supplement: d4tc02466d1.pdf [file d4tc02466d1.pdf]

## Supplementary Information

### Near stoichiometric lithium niobate crystal with dramatically enhanced piezoelectric performance for high temperature acceleration sensing

Guoliang Wang<sup>a</sup>, Fulei Wang<sup>b,c</sup>, Xi Gao<sup>a</sup>, Dongzhou Wang<sup>\*b,c</sup>, Wei Song<sup>d</sup>, Yanlu Li<sup>\*a</sup>, Xueliang Liu<sup>a</sup>, Yuanhua Sang<sup>a</sup>, Fapeng Yu<sup>\*a</sup> and Xian Zhao<sup>a</sup>

<sup>a</sup> State Key Laboratory of Crystal Materials, Shandong University, Jinan, 250100, China

<sup>b</sup> Jinan Institute of Quantum Technology, Jinan 250101, China

<sup>c</sup> Jinan Branch, Hefei National Laboratory, Jinan 250101, China

<sup>d</sup> CETC Deqing Huaying Electronics Co., Ltd, Zhejiang 313200, China

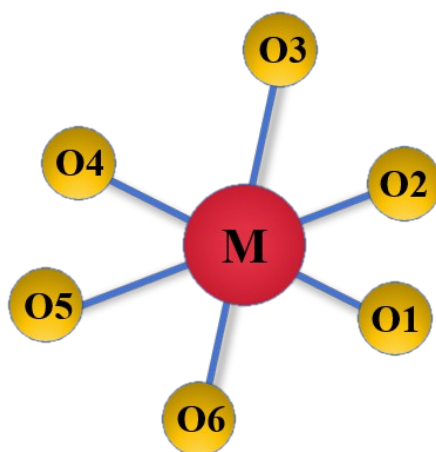

Fig. S1 Distortion model of the MO<sub>6</sub> polyhedron.

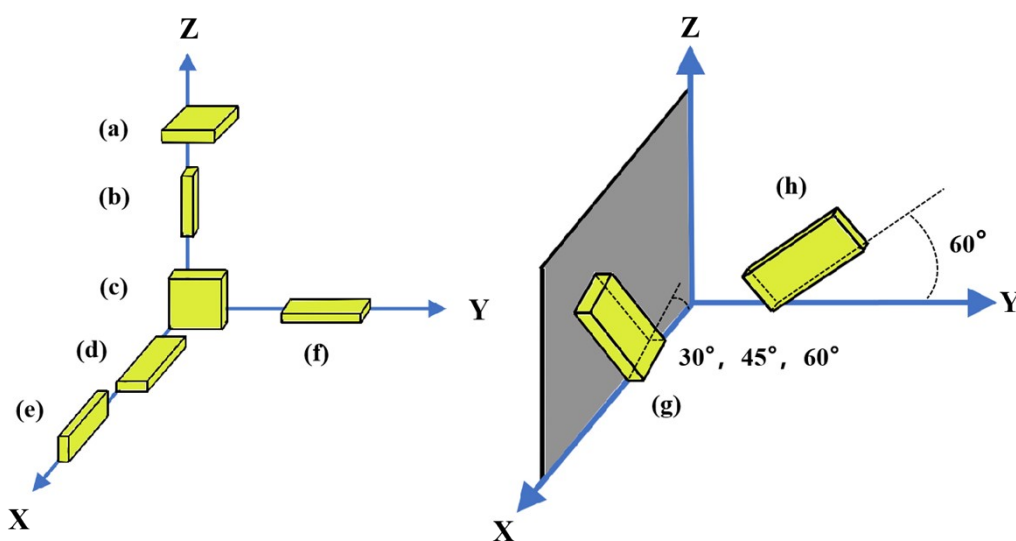

Fig. S2 Crystal cuts for evaluation of the electro-elastic constants [(a) Z-square plate; (b) Z bar; (c) X-square plate; (d) ZX plate; (e) YX plate; (f) ZY plate; (g) YZt/ $\theta$  ( $\theta = 30^\circ, 45^\circ$  and  $60^\circ$ ); (h) XYt/ $\theta$  ( $\theta = 60^\circ$ )]

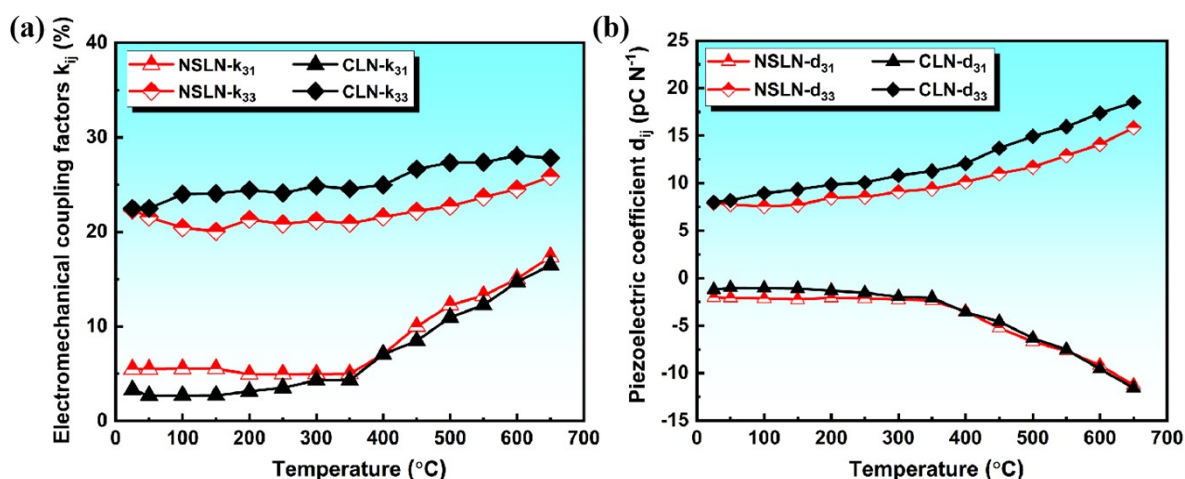

**Fig. S3** Variations of (a) electromechanical coupling factors, (b) piezoelectric coefficients as a function of temperatures for NSLN and CLN crystals.

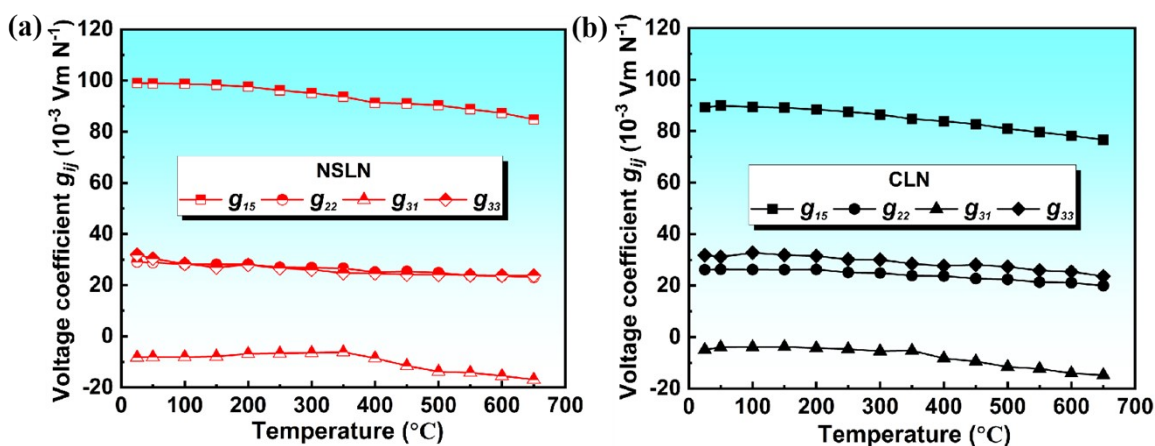

**Fig. S4** Variations of piezoelectric voltage coefficients  $g_{ij}$  as a function of temperatures for (a) NSLN and (b) CLN crystals.

It was found that the piezoelectric voltage coefficients  $g_{ij}$  for NSLN and CLN all showed a decreasing trend with temperature, as shown in Fig. S4. There was a good observation that while the  $d_{ij}$  was relatively stable with temperature, the increase in  $\epsilon_{ij}$  with temperature led to a slight decrease in  $g_{ij}$  (since  $g_{ij} = d_{ij} / \epsilon_{ij}$ ) for NSLN and CLN crystals. Clearly that the  $g_{15}$  demonstrated maximum values, which were represented by  $98.9 \times 10^{-3} \text{ Vm N}^{-1}$  and  $89.2 \times 10^{-3} \text{ Vm N}^{-1}$  for NSLN and CLN crystals at room temperature.

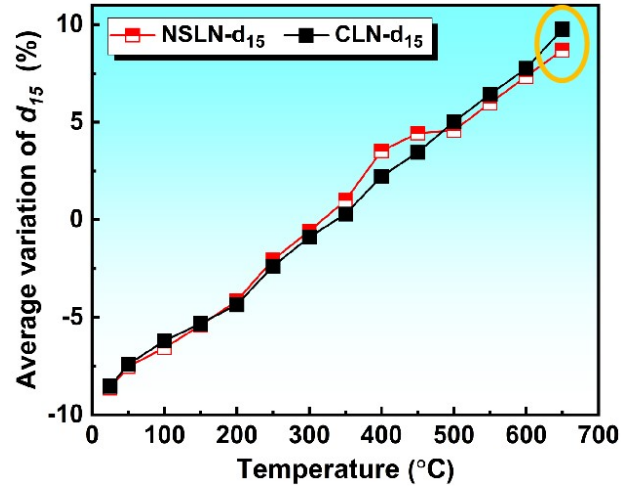

**Fig. S5** Average variations of the piezoelectric coefficients  $d_{15}$  as a function of temperatures for NSLN and CLN crystals.

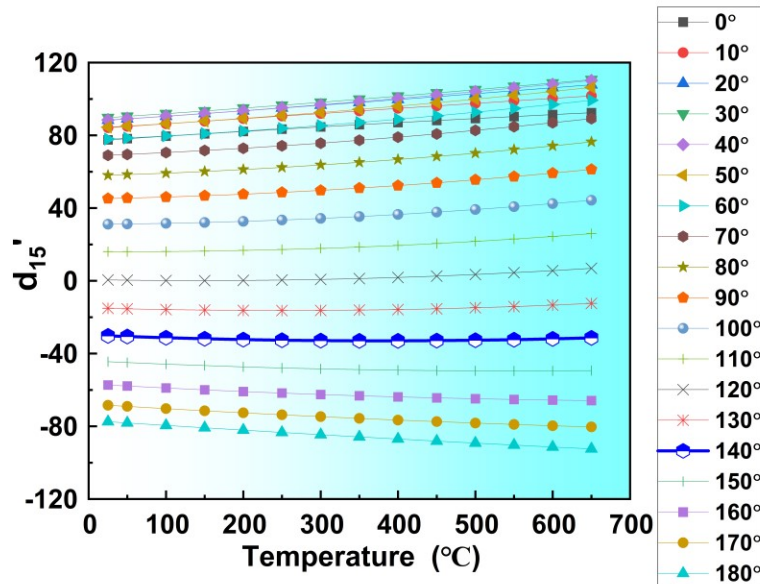

**Fig. S6** Variations of the effective piezoelectric coefficients  $d'_{15}$  rotated around the X-axis with different angles as a function of temperatures for NSLN crystal.

**Table S1** Crystal cuts, vibration modes, material constants and related equations for determination of the electro-elastic constants for NSLN and CLN crystals.

| Crystal cuts                   | Vibration modes     | Material constants                     | Related equations                                                                                                                                                                                                                                                                                                                                                                                                            |
|--------------------------------|---------------------|----------------------------------------|------------------------------------------------------------------------------------------------------------------------------------------------------------------------------------------------------------------------------------------------------------------------------------------------------------------------------------------------------------------------------------------------------------------------------|
| X plate                        | /                   | $\epsilon_{11}^T / \epsilon_0$         | $\frac{\epsilon_{ii}^T}{\epsilon_0} = \frac{C \cdot t}{A \cdot \epsilon_0}$                                                                                                                                                                                                                                                                                                                                                  |
| Z plate                        | /                   | $\epsilon_{33}^T / \epsilon_0$         |                                                                                                                                                                                                                                                                                                                                                                                                                              |
| X plate                        | thickness shear     | $d_{15}, s_{55}^E$                     | $k_{ij}^2 = \frac{\pi f_r}{2 f_a} \tan \frac{\pi}{2} \left( \frac{f_a - f_r}{f_a} \right)$ $s_{ii}^E = \frac{l}{4\rho (f_a)^2 (1 - k_{ij}^2)}$ $d_{ij} = k_{ij} \sqrt{\epsilon_{ii}^T s_{jj}^E}$                                                                                                                                                                                                                             |
| Z bar                          | longitudinal        | $d_{33}, s_{33}^E$                     | $k_{ii}^2 = \frac{\pi f_r}{2 f_a} \tan \frac{\pi}{2} \left( \frac{f_a - f_r}{f_a} \right)$ $s_{ii}^E = \frac{l}{4\rho (f_a)^2 (1 - k_{ii}^2)}$ $d_{ii} = k_{ii} \sqrt{\epsilon_{ii}^T s_{jj}^E}$                                                                                                                                                                                                                             |
| YX plate<br>ZX plate           | length<br>extension | $d_{21}, s_{11}^E$                     | $\frac{k_{ij}^2}{1 - k_{ij}^2} = \frac{\pi f_a}{2 f_r} \tan \frac{\pi}{2} \left( \frac{f_a - f_r}{f_a} \right)$ $s_{ii}^E = \frac{l}{4\rho (f_r)^2}$ $d_{ij} = k_{ij} \sqrt{\epsilon_{ii}^T s_{jj}^E}$                                                                                                                                                                                                                       |
| YZt/ $\theta$<br>XYt/ $\theta$ |                     | $s_{13}^E, s_{12}^E$<br><br>$s_{14}^E$ | $s_{33}^{E'}(\theta) = s_{11}^E \sin^4 \theta + s_{33}^E \cos^4 \theta + (2s_{13}^E + s_{44}^E) \sin^2 \theta \cos^2 \theta$ $s_{22}^{E'}(\theta) = s_{11}^E \cos^4 \theta + s_{33}^E \sin^4 \theta + (2s_{13}^E + s_{44}^E) \sin^2 \theta \cos^2 \theta - 2s_{14}^E \sin \theta \cos^3 \theta$ $s_{11}^{E'}(\theta) = s_{11}^E \cos^4 \theta + s_{11}^E \sin^4 \theta + (2s_{12}^E + s_{66}^E) \sin^2 \theta \cos^2 \theta$ |

**Table S2** Distortion  $\Delta d$  of each octahedron contained in the pristine phase and the defect phase.

|                                         | Bond                             | Bond distances (Å) | Bond angle (°) | $\Delta d$ (Å)                       |
|-----------------------------------------|----------------------------------|--------------------|----------------|--------------------------------------|
| Pristine phase<br>(Nb-O)                | Nb <sub>1</sub> -O <sub>1</sub>  | 1.90022            | 165.0362       | <b>0.756</b>                         |
|                                         | Nb <sub>1</sub> -O <sub>4</sub>  | 2.14370            |                |                                      |
|                                         | Nb <sub>1</sub> -O <sub>2</sub>  | 1.90022            | 165.0376       |                                      |
|                                         | Nb <sub>1</sub> -O <sub>5</sub>  | 2.14370            |                |                                      |
|                                         | Nb <sub>1</sub> -O <sub>3</sub>  | 1.90021            | 165.0349       |                                      |
|                                         | Nb <sub>1</sub> -O <sub>6</sub>  | 2.14372            |                |                                      |
| Pristine phase<br>(Li-O)                | Li <sub>1</sub> -O <sub>1</sub>  | 2.23463            | 156.0552       | <b>0.671</b>                         |
|                                         | Li <sub>1</sub> -O <sub>4</sub>  | 2.03026            |                |                                      |
|                                         | Li <sub>1</sub> -O <sub>2</sub>  | 2.23468            | 156.0533       |                                      |
|                                         | Li <sub>1</sub> -O <sub>5</sub>  | 2.03026            |                |                                      |
|                                         | Li <sub>1</sub> -O <sub>3</sub>  | 2.23461            | 156.0537       |                                      |
|                                         | Li <sub>1</sub> -O <sub>6</sub>  | 2.03025            |                |                                      |
| $V_{Li}^-$<br>(Nb <sub>1</sub> -O)      | Nb <sub>1</sub> -O <sub>1</sub>  | 1.91450            | 168.9592       | 0.591                                |
|                                         | Nb <sub>1</sub> -O <sub>4</sub>  | 2.10781            |                |                                      |
|                                         | Nb <sub>1</sub> -O <sub>2</sub>  | 1.91439            | 168.9622       |                                      |
|                                         | Nb <sub>1</sub> -O <sub>5</sub>  | 2.10751            |                |                                      |
|                                         | Nb <sub>1</sub> -O <sub>3</sub>  | 1.91426            | 169.0006       |                                      |
|                                         | Nb <sub>1</sub> -O <sub>6</sub>  | 2.10761            |                |                                      |
| (Nb <sub>2</sub> -O)                    | /                                | /                  | /              | 0.782                                |
| (Nb <sub>3</sub> -O)                    | /                                | /                  | /              | 0.713                                |
| (Nb <sub>4</sub> -O)                    | /                                | /                  | /              | 0.807                                |
| (Nb <sub>5</sub> -O)                    | /                                | /                  | /              | 0.711                                |
| (Nb <sub>6</sub> -O)                    | /                                | /                  | /              | 0.807                                |
| (Nb <sub>7</sub> -O)                    | /                                | /                  | /              | 0.712                                |
| (Nb <sub>8</sub> -O)                    | /                                | /                  | /              | 0.807                                |
|                                         | /                                | /                  | /              | $\overline{\Delta d}$ = <b>0.741</b> |
| $Nb_{Li}^{4+}$<br>(Nb <sub>Li</sub> -O) | Nb <sub>Li</sub> -O <sub>1</sub> | 2.12294            | 157.1173       | <b>0.629</b>                         |
|                                         | Nb <sub>Li</sub> -O <sub>4</sub> | 1.92963            |                |                                      |
|                                         | Nb <sub>Li</sub> -O <sub>2</sub> | 2.12206            | 157.1548       |                                      |
|                                         | Nb <sub>Li</sub> -O <sub>5</sub> | 1.92955            |                |                                      |
|                                         | Nb <sub>Li</sub> -O <sub>3</sub> | 2.12309            | 157.1493       |                                      |
|                                         | Nb <sub>Li</sub> -O <sub>6</sub> | 1.92955            |                |                                      |

**Table S3** Elastic constants ( $c_{ij}$ ) and piezoelectric stress constants ( $e_{ij}$ ) of  $V_{Li}^-$  and  $Nb_{Li}^{4+}$  calculation models.

| $c_{ij}$       | $c_{11}$ | $c_{12}$ | $c_{13}$ | $c_{14}$ | $c_{33}$ | $c_{44}$ | $c_{66}$ |
|----------------|----------|----------|----------|----------|----------|----------|----------|
| $V_{Li}^-$     | 216      | 74.6     | 80.7     | 8.5      | 239      | 59.3     | 69.9     |
| $Nb_{Li}^{4+}$ | 223      | 78.1     | 81.6     | 5.5      | 238      | 65.9     | 72       |

  

| $e_{ij}$       | $e_{15}$ | $e_{22}$ | $e_{31}$ | $e_{33}$ |
|----------------|----------|----------|----------|----------|
| $V_{Li}^-$     | 4.11     | 2.12     | 0.45     | 1.13     |
| $Nb_{Li}^{4+}$ | 3.31     | 1.60     | 0.58     | 0.97     |

**Table S4** Concentration of  $V_{Li}^-$  and  $Nb_{Li}^{4+}$  for LN crystal with different [Li]/[Nb] ratios.

| Concentration      | NSLN<br>(49.83:50.17) | $V_{Li}^-$<br>(48.94:51.06) | CLN<br>(48.65:51.35) | $Nb_{Li}^{4+}$<br>(47.92:52.08) |
|--------------------|-----------------------|-----------------------------|----------------------|---------------------------------|
| $V_{Li}^-$ (%)     | 0.272                 | 1.696                       | 2.160                | 3.328                           |
| $Nb_{Li}^{4+}$ (%) | 0.068                 | 0.424                       | 0.540                | 0.832                           |

**Table S5** Bond distances and bond angles for NSLN and CLN crystals. Variations of the distortion  $\Delta d$  of  $NbO_6$  and  $LiO_6$  octahedron for NSLN and CLN crystals.

| NSLN               |        |                     |         |                |                      |
|--------------------|--------|---------------------|---------|----------------|----------------------|
| Bond distances (Å) |        | Bond angles (°)     |         | $\Delta d$ (Å) | Total $\Delta d$ (Å) |
| Nb-O <sub>1</sub>  | 2.1354 | $\angle O_1-Nb-O_4$ | 165.588 | 0.2812         | <b>0.8448</b>        |
| Nb-O <sub>4</sub>  | 1.8631 |                     |         |                |                      |
| Nb-O <sub>2</sub>  | 1.8629 | $\angle O_2-Nb-O_5$ | 165.593 | 0.2815         |                      |
| Nb-O <sub>5</sub>  | 2.1356 |                     |         |                |                      |
| Nb-O <sub>3</sub>  | 2.1358 | $\angle O_3-Nb-O_6$ | 165.604 | 0.2821         |                      |
| Nb-O <sub>6</sub>  | 1.8626 |                     |         |                |                      |

  

| NSLN               |        |                     |         |                |                      |
|--------------------|--------|---------------------|---------|----------------|----------------------|
| Bond distances (Å) |        | Bond angles (°)     |         | $\Delta d$ (Å) | Total $\Delta d$ (Å) |
| Li-O <sub>1</sub>  | 2.2566 | $\angle O_1-Li-O_4$ | 153.616 | 0.2272         | <b>0.6800</b>        |
| Li-O <sub>4</sub>  | 2.0531 |                     |         |                |                      |
| Li-O <sub>2</sub>  | 2.0534 | $\angle O_2-Li-O_5$ | 153.604 | 0.2266         |                      |

|                   |        |                     |         |        |
|-------------------|--------|---------------------|---------|--------|
| Li-O <sub>5</sub> | 2.2564 |                     |         |        |
| Li-O <sub>3</sub> | 2.2562 | $\angle O_3-Li-O_6$ | 153.602 | 0.0062 |
| Li-O <sub>6</sub> | 2.0536 |                     |         |        |

| CLN                |        |                     |         |                |                      |
|--------------------|--------|---------------------|---------|----------------|----------------------|
| Bond distances (Å) |        | Bond angles (°)     |         | $\Delta d$ (Å) | Total $\Delta d$ (Å) |
| Nb-O <sub>1</sub>  | 2.1277 | $\angle O_1-Nb-O_4$ | 165.681 | 0.2628         | <b>0.7884</b>        |
| Nb-O <sub>4</sub>  | 1.8731 |                     |         |                |                      |
| Nb-O <sub>2</sub>  | 1.8731 | $\angle O_2-Nb-O_5$ | 165.681 | 0.2628         |                      |
| Nb-O <sub>5</sub>  | 2.1277 |                     |         |                |                      |
| Nb-O <sub>3</sub>  | 2.1277 | $\angle O_3-Nb-O_6$ | 165.681 | 0.2628         |                      |
| Nb-O <sub>6</sub>  | 1.8731 |                     |         |                |                      |

| CLN                |        |                     |         |                |                      |
|--------------------|--------|---------------------|---------|----------------|----------------------|
| Bond distances (Å) |        | Bond angles (°)     |         | $\Delta d$ (Å) | Total $\Delta d$ (Å) |
| Li-O <sub>1</sub>  | 2.2696 | $\angle O_1-Li-O_4$ | 152.464 | 0.2479         | <b>0.7437</b>        |
| Li-O <sub>4</sub>  | 2.0497 |                     |         |                |                      |
| Li-O <sub>2</sub>  | 2.0497 | $\angle O_2-Li-O_5$ | 152.464 | 0.2479         |                      |
| Li-O <sub>5</sub>  | 2.2696 |                     |         |                |                      |
| Li-O <sub>3</sub>  | 2.2696 | $\angle O_3-Li-O_6$ | 152.464 | 0.2479         |                      |
| Li-O <sub>6</sub>  | 2.0497 |                     |         |                |                      |

**Table S6** Cell parameters for NSLN and CLN crystals.

|                                    | NSLN                        | CLN                         |
|------------------------------------|-----------------------------|-----------------------------|
| Crystal system                     | Trigonal                    | Trigonal                    |
| Space group                        | 3m                          | 3m                          |
| Unit cell dimension (Å)            | $a=5.1380(6), c=13.8300(2)$ | $a=5.1417(6), c=13.8520(2)$ |
| c/a                                | 2.6917                      | 2.6941                      |
| Unit cell volume (Å <sup>3</sup> ) | 316.18                      | 317.14                      |

**Table S7** Atomic coordinates for NSLN and CLN crystals.

| NSLN            |         |         |         |
|-----------------|---------|---------|---------|
| Atom            | x       | y       | z       |
| Nb <sub>1</sub> | 0.66667 | 0.33333 | 0.46880 |
| O <sub>1</sub>  | 0.99192 | 0.37193 | 0.36503 |
| O <sub>2</sub>  | 0.96140 | 0.67467 | 0.53165 |
| O <sub>3</sub>  | 0.62803 | 0.62004 | 0.36503 |

---

|                |         |         |         |
|----------------|---------|---------|---------|
| O <sub>4</sub> | 0.32529 | 0.28667 | 0.53165 |
| O <sub>5</sub> | 0.37992 | 0.00804 | 0.36503 |
| O <sub>6</sub> | 0.71329 | 0.03856 | 0.53165 |

---

---

| NSLN            |          |         |         |
|-----------------|----------|---------|---------|
| Atom            | x        | y       | z       |
| Li <sub>1</sub> | 0.33333  | 0.66667 | 0.58200 |
| O <sub>1</sub>  | 0.65864  | 0.70527 | 0.69838 |
| O <sub>2</sub>  | 0.71333  | 1.03859 | 0.53169 |
| O <sub>3</sub>  | 0.29475  | 0.95338 | 0.69838 |
| O <sub>4</sub>  | -0.03856 | 0.67469 | 0.53169 |
| O <sub>5</sub>  | 0.04664  | 0.34138 | 0.69838 |
| O <sub>6</sub>  | 0.32533  | 0.28669 | 0.53169 |

---

---

| CLN             |         |          |         |
|-----------------|---------|----------|---------|
| Atom            | x       | y        | z       |
| Nb <sub>1</sub> | 0.66667 | 0.33333  | 0.53210 |
| O <sub>1</sub>  | 0.95213 | 0.29514  | 0.63539 |
| O <sub>2</sub>  | 1.00969 | 0.62846  | 0.46870 |
| O <sub>3</sub>  | 0.70482 | 0.65696  | 0.63539 |
| O <sub>4</sub>  | 0.37151 | 0.38120  | 0.46870 |
| O <sub>5</sub>  | 0.34300 | 0.04783  | 0.63539 |
| O <sub>6</sub>  | 0.61876 | -0.00973 | 0.46870 |

---

---

| CLN             |          |          |         |
|-----------------|----------|----------|---------|
| Atom            | x        | y        | z       |
| Li <sub>1</sub> | 0        | 0        | 0.42000 |
| O <sub>1</sub>  | 0.28547  | -0.03813 | 0.30204 |
| O <sub>2</sub>  | 0.37153  | 0.38125  | 0.46866 |
| O <sub>3</sub>  | 0.03815  | 0.32363  | 0.30204 |
| O <sub>4</sub>  | -0.38122 | -0.00968 | 0.46866 |
| O <sub>5</sub>  | -0.32360 | -0.28544 | 0.30204 |
| O <sub>6</sub>  | 0.00971  | -0.37150 | 0.46866 |

---
